# Supplementary material
Source: PubMed Central journal article supplement (PMC7458812)
Supplement: supp_AC120.014872_161598_2_supp_570062_qdxlp8.pdf [file supp_AC120.014872_161598_2_supp_570062_qdxlp8.pdf]

## Supporting Information

### Evidence that polyphenols do not inhibit the phospholipid scramblase TMEM16F

Trieu Le<sup>1</sup>, Son C. Le<sup>1</sup>, Yang Zhang<sup>1</sup>, Pengfei Liang<sup>1</sup>, Huanghe Yang<sup>1,2\*</sup>

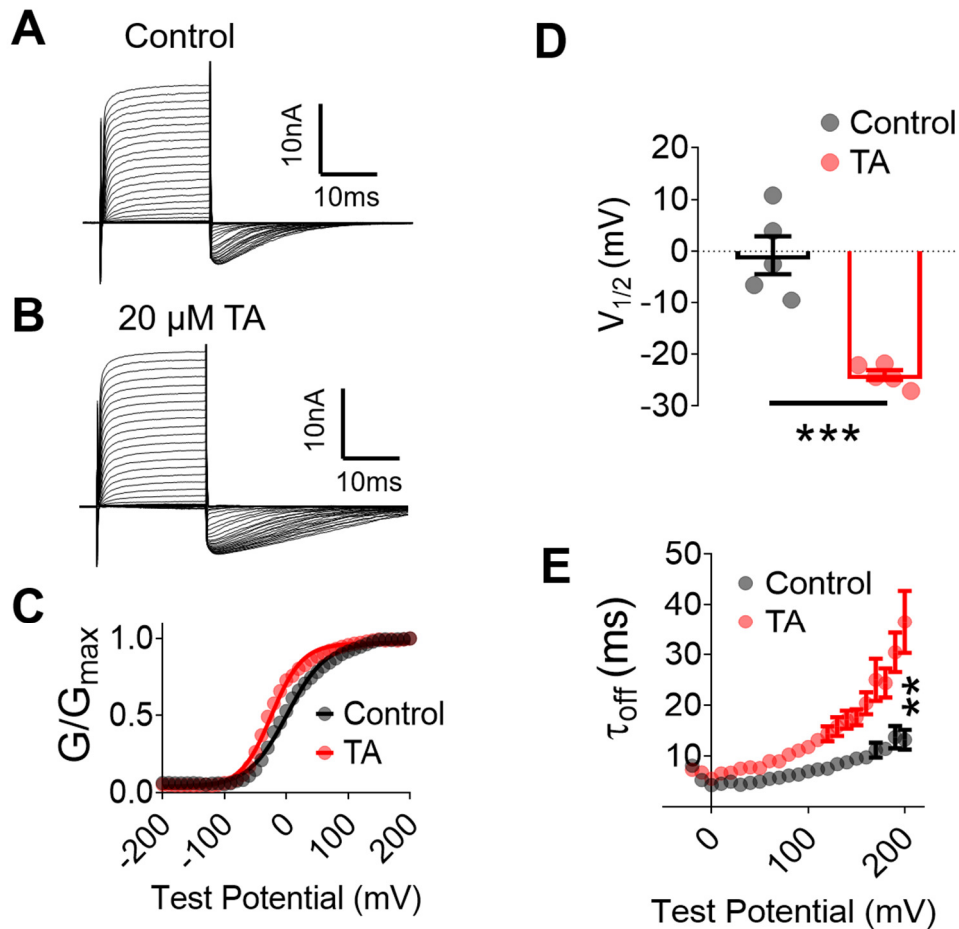

**Figure S1. TA activates BK channels.** *A*, representative BK currents recorded from HEK-293T cells overexpressed BK- $\alpha$  subunit under outside-out configuration. Intracellular solution contained 100  $\mu\text{M}$   $\text{Ca}^{2+}$ . Currents were evoked by steps from  $-200$  to  $+200$  mV with 10 mV increments and holding potential was set at  $-60$  mV. *B*, representative BK currents recorded from outside-out patches containing 100  $\mu\text{M}$   $\text{Ca}^{2+}$  in the pipette and 20  $\mu\text{M}$  TA from extracellular side. *C*, mean  $G$ - $V$  relations of the BK channels with and without TA. Relative conductance was determined by measuring the amplitude of tail currents 400  $\mu\text{s}$  after repolarization to a fixed membrane potential ( $-60$  mV). The smooth curves represent Boltzmann fits  $G/G_{\text{max}} = 1/(1 + \exp(-ze(V - V_{1/2})/kT))$ .  $G_{\text{max}}$  represents tail current amplitude in response to depolarization to  $+200$  mV. Error bars represent SEM ( $N=5$ ). *D*,  $V_{1/2}$  obtained from C.  $V_{1/2}$  in the absence and presence of TA were  $-0.77 \pm 3.7$  mV and  $-24.0 \pm 1$  mV, respectively. Student's t-test was performed and \*\*\* represents  $p < 0.001$  ( $N=5$ ). *E*,  $\tau_{\text{off}}$  obtained from single exponential fitting of the tail currents for both control and in the presence of TA. Average  $\tau_{\text{off}}$  at 200 mV were  $13.2 \pm 2.0$  ms and  $36.5 \pm 6.2$  ms, respectively. Student's t-test was performed and \*\* represents  $p < 0.01$  ( $N=5$ ).

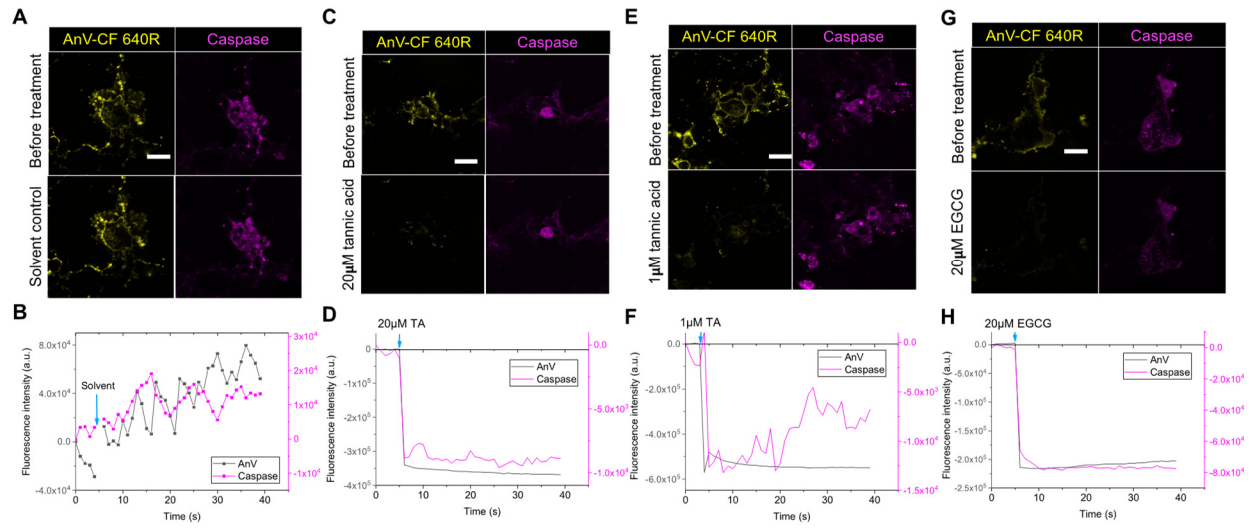

**Figure S2. TA and EGCG instantaneously suppress fluorescence signal from AnV-CF640R that are bound to PS on the surface of apoptotic cells.** *A, C, E* and *G*, representative images showing the effect of control (*A*), 20  $\mu\text{M}$  TA (*C*), 1  $\mu\text{M}$  TA (*E*), and 20  $\mu\text{M}$  EGCG (*G*) on AnV-CF640R signal (yellow) on membrane surface of STS-induced apoptotic cells, which are labeled by caspase 3/7 dye (magenta). Scale bars = 25  $\mu\text{m}$ . *B, D, F* and *H*, plots show the quantification of AnV and caspase dye fluorescence intensity before and after treatments of control (*B*), 20  $\mu\text{M}$  TA (*D*), 1  $\mu\text{M}$  TA (*F*) and 20  $\mu\text{M}$  EGCG (*H*) of each cell in *A, C, E* and *G*, respectively. All images are representatives of at least three independent biological replicates.

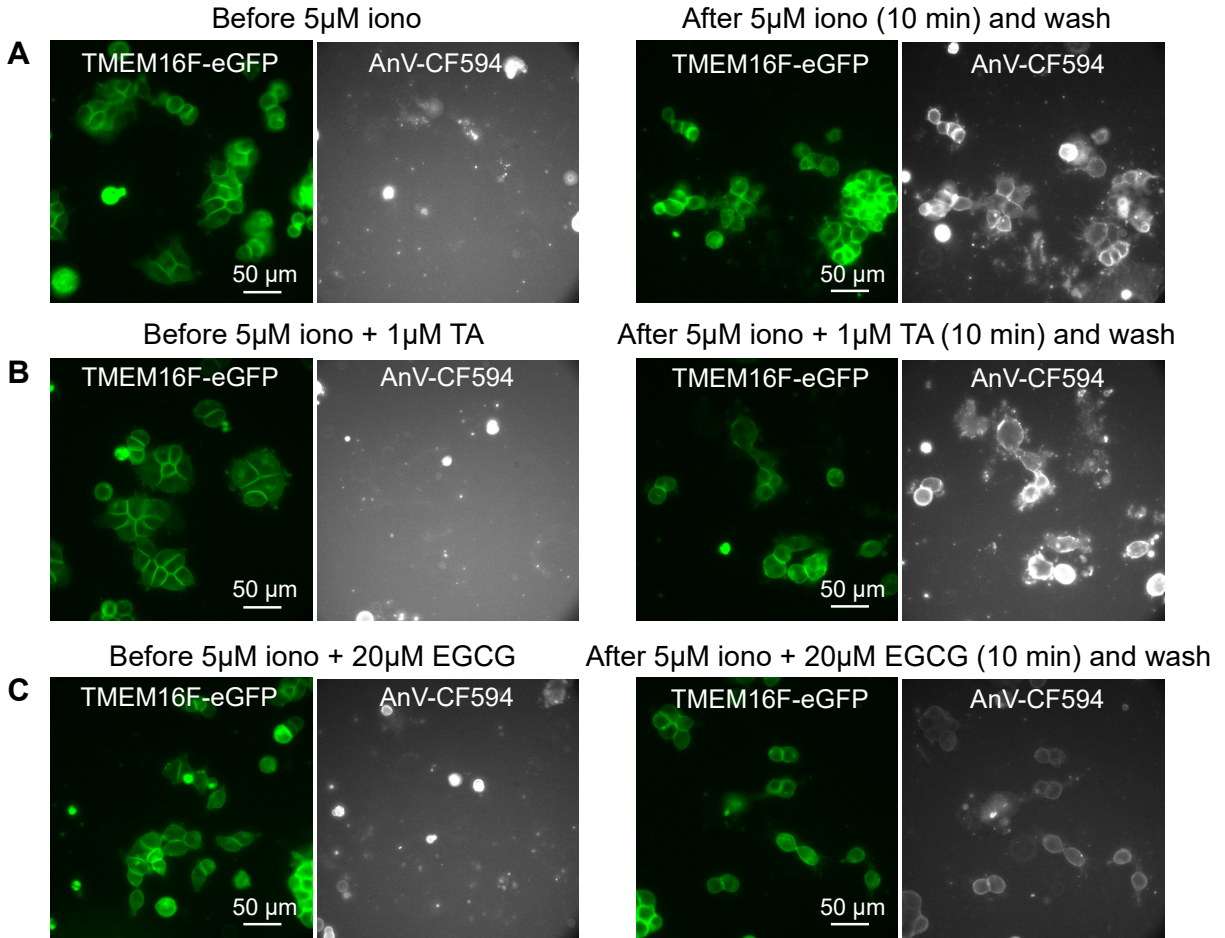

**Figure S3. TA and EGCG do not prevent TMEM16F phospholipid scrambling.** Left columns, representative images showing the AnV-CF594 staining of the HEK293 cells stably expressing mouse eGFP-tagged-TMEM16F (TMEM16F-eGFP) before treatment. The viable cells were AnV negative. The coverslips were subsequently transferred to new imaging chambers with either 5  $\mu$ M ionomycin (iono) alone (A), 5  $\mu$ M iono with 1  $\mu$ M TA (B), or 5  $\mu$ M iono with 20  $\mu$ M EGCG (C) to stimulate TMEM16F activation for 10 minutes. Right columns, after stimulation, the cells were washed rigorously with HBSS twice and then AnV-CF594 was reintroduced to stain PS-exposed cells. All images are representatives of at least three independent biological replicates.
